# Supplementary material for: Outcome differences in HPV-driven head and neck squamous cell carcinoma attributable to altered human leukocyte antigen frequencies
Source: PubMed Central journal article supplement (PMC10772155; doi:10.3389/fonc.2023.1212454), 2023-12-21
Supplement: DataSheet_1.pdf [file DataSheet_1.pdf]

**Table S1.** Frequencies of top 20 triplotypes in a large German sample of healthy blood donors [21] and HPV-driven head and neck squamous cell carcinoma (HNSCC; this study) accompanied by linkage disequilibrium, odds ratio (OR) and 95% confidence interval (95% CI) together with the 2-sided  $P$  value ( $P$  value †), Benjamini-Hochberg corrected  $P$  value ( $P$  value ††) [23] and false-positive reporting probability (FPRP) [24] and the effect on development of HPV-driven HNSCC according to detected genetic association in our cohort.

|              | $f$ observed † | diplotype frequency $f_{ab}$ | allele frequency $f_a$ | allele frequency $f_b$ | $D_{ab} = f_{ab} - f_a f_b$ †† | OR (95% CI)            | $P$ value †    | $P$ value ††  | FPRP-level ‡ | Effect       |
|--------------|----------------|------------------------------|------------------------|------------------------|--------------------------------|------------------------|----------------|---------------|--------------|--------------|
| A1-B8-DR3    | 0.062          | 0.019                        | 0.085                  | 0.037                  | 0.015                          | 0.285 (0.155 - 0.522)  | <b>0.00004</b> | <b>0.0042</b> | 0.0014       | Protective   |
| A1-B57-DR7   | 0.009          | 0.001                        | 0.106                  | 0.008                  | 0.0005                         | 0.143 (0.017 - 1.163)  | 0.0689         |               | 0.9365       | Protective § |
| A2-B7-DR15   | 0.022          | 0.005                        | 0.138                  | 0.029                  | 0.001                          | 0.235 (0.078 - 0.702)  | <b>0.0095</b>  | 0.8074        | 0.4546       | Protective   |
| A2-B8-DR3    | 0.007          | 0.005                        | 0.085                  | 0.016                  | 0.004                          | 0.801 (0.214 - 2.998)  | 0.7420         |               | 0.9955       |              |
| A2-B13-DR7   | 0.009          | 0.004                        | 0.106                  | 0.013                  | 0.003                          | 0.415 (0.108 - 1.604)  | 0.2025         |               | 0.9767       |              |
| A2-B44-DR4   | 0.014          | 0.011                        | 0.133                  | 0.029                  | 0.007                          | 0.775 (0.306 - 1.964)  | 0.5914         |               | 0.9884       |              |
| A2-B44-DR11  | 0.007          | 0.001                        | 0.090                  | 0.029                  | -0.001                         | 0.190 (0.022 - 1.614)  | 0.1281         |               | 0.9733       |              |
| A2-B44-DR13  | 0.006          | 0.001                        | 0.079                  | 0.029                  | -0.001                         | 0.208 (0.024 - 1.796)  | 0.1533         |               | 0.9795       |              |
| A2-B57-DR7   | 0.008          | 0.009                        | 0.106                  | 0.021                  | 0.007                          | 1.128 (0.381 - 3.339)  | 0.8276         |               | 0.9949       |              |
| A2-B60-DR13  | 0.011          | 0.001                        | 0.079                  | 0.029                  | -0.001                         | 0.119 (0.015 - 0.949)  | <b>0.0445</b>  | > 0.999       | 0.8883       | Protective   |
| A2-B62-DR4   | 0.018          | 0.003                        | 0.133                  | 0.011                  | 0.001                          | 0.144 (0.032 - 0.635)  | <b>0.0105</b>  | 0.8827        | 0.5307       | Protective   |
| A2-B62-DR13  | 0.008          | 0.003                        | 0.079                  | 0.011                  | 0.002                          | 0.332 (0.067 - 1.650)  | 0.1777         |               | 0.9778       |              |
| A3-B7-DR15   | 0.034          | 0.021                        | 0.138                  | 0.048                  | 0.015                          | 0.611 (0.325 - 1.149)  | 0.1264         | > 0.999       | 0.8766       |              |
| A3-B35-DR1   | 0.017          | 0.004                        | 0.122                  | 0.021                  | 0.001                          | 0.232 (0.066 - 0.819)  | <b>0.0232</b>  | > 0.999       | 0.7291       | Protective   |
| A11-B35-DR1  | 0.007          | 0.003                        | 0.122                  | 0.013                  | 0.001                          | 0.353 (0.070 - 1.779)  | 0.2072         |               | 0.9821       |              |
| A23-B44-DR7  | 0.007          | 0.003                        | 0.106                  | 0.005                  | 0.002                          | 0.368 (0.072 - 1.867)  | 0.2275         |               | 0.9843       |              |
| A24-B7-DR15  | 0.006          | 0.004                        | 0.138                  | 0.013                  | 0.002                          | 0.589 (0.141 - 2.461)  | 0.4676         |               | 0.9927       |              |
| A25-B18-DR15 | 0.007          | 0.007                        | 0.138                  | 0.013                  | 0.005                          | 0.919 (0.272 - 3.109)  | 0.8921         |               | 0.9959       |              |
| A29-B44-DR7  | 0.009          | 0.000                        | 0.106                  | 0.003                  | -0.0002                        | 0.070 (0.006 - 0.769)¶ | <b>0.0297</b>  | > 0.999       | 0.8700       | Protective   |
| A30-B13-DR7  | 0.007          | 0.004                        | 0.106                  | 0.008                  | 0.003                          | 0.610 (0.145 - 2.577)  | 0.5016         |               | 0.9935       |              |

† Frequencies in healthy blood donors according to Müller et al. [21];  $D_{ab} = f_{ab} - f_a f_b$ , absolute linkage disequilibrium of antigens  $a$  and  $b$ ; OR (95% CI), odds ratio (95% confidence interval); †  $P$  value from Pearson's Chi-square ( $\chi^2$ ) test; †† Benjamini-Hochberg-corrected  $P$  value [23] from  $\chi^2$  tests; ‡ False positive reporting probability (FPRP) according to Wacholder et al., 2004 [24]; ¶ odds ratio corrected according to Cox by adding 1 to each cell preventing division by zero.

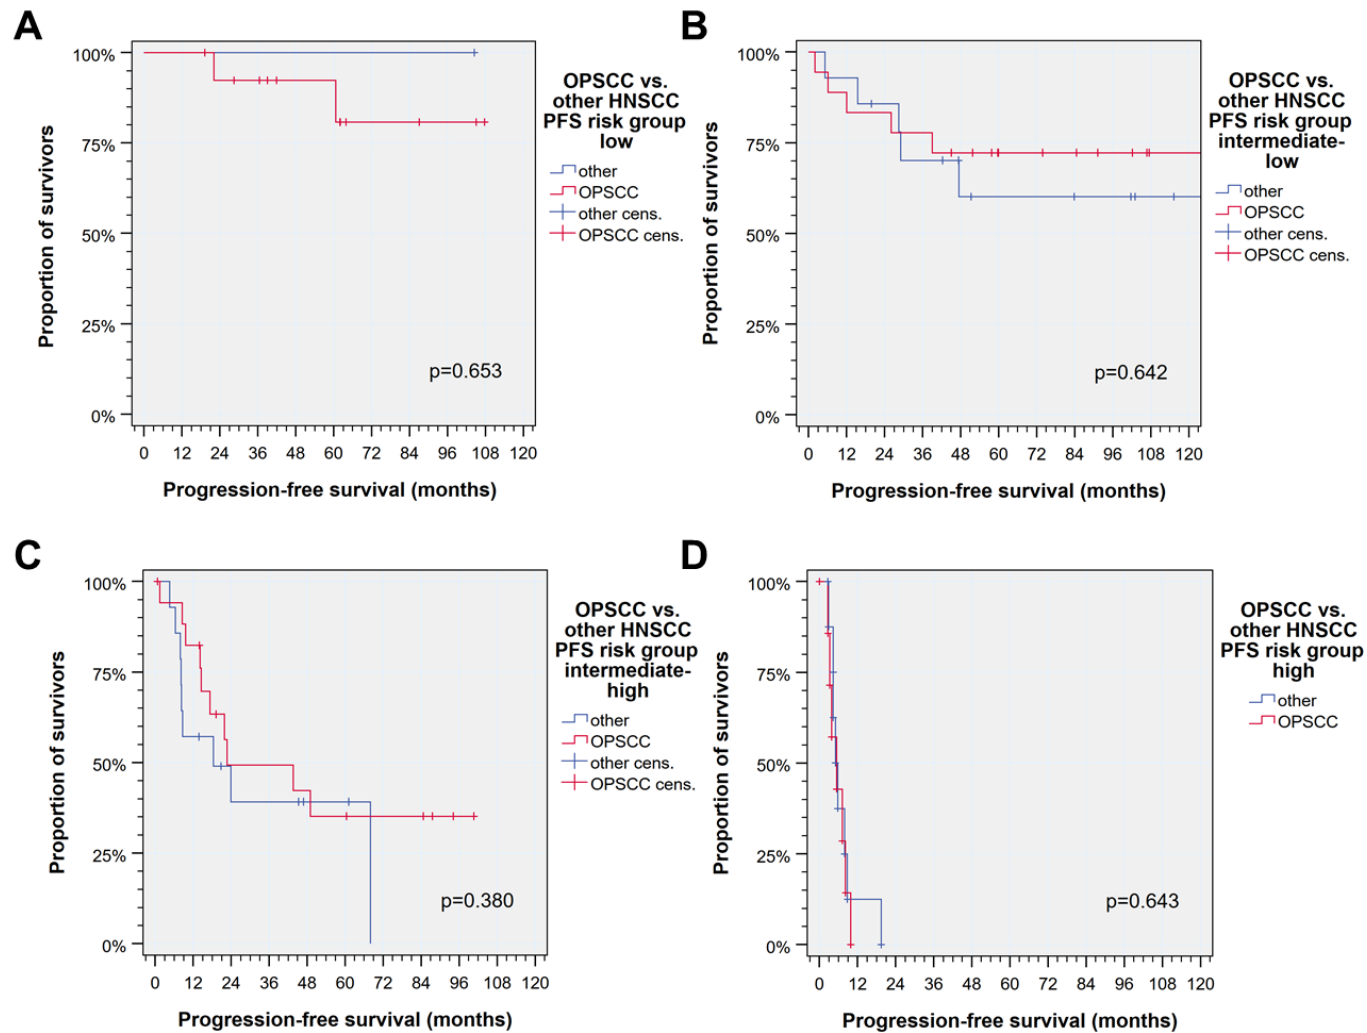

Figure S1. Kaplan-Meier cumulative survival plots [25] for HPV-driven OPSCC *versus* other (HPV-driven HNSCC with primary outside oropharynx) demonstrate insignificant differences in progression-free survival among the individual PFS risk groups according to the newly developed score.
